# Supplementary material for: Fabrication of In2O3 modified ZnO for enhancing stability, optical behaviour, electronic properties and photocatalytic activity for hydrogen production under visible light
Source: Royal Society of Chemistry journal article supplement (doi:10.1039/c3ta14285j), 2013-12-06
Supplement: c3ta14285j.pdf [file c3ta14285j.pdf]

## SUPPLEMENTARY INFORMATION

**Fabrication of In<sub>2</sub>O<sub>3</sub> modified ZnO for enhancing stability, optical behaviour, electronic property and photocatalytic activity for hydrogen production under visible light**

**Satyabadi Martha, K. Hemalata Reddy and K. M. Parida\***

Colloids and Materials Chemistry Department,  
CSIR-Institute of Minerals and Materials Technology,  
Bhubaneswar – 751 013, Odisha, India

\*Corresponding author

E-mail: [paridakulamani@yahoo.com](mailto:paridakulamani@yahoo.com) & [kmparida@immt.res.in](mailto:kmparida@immt.res.in)

Tel. No. +91-674-2379425

Fax. +91-674-2581637

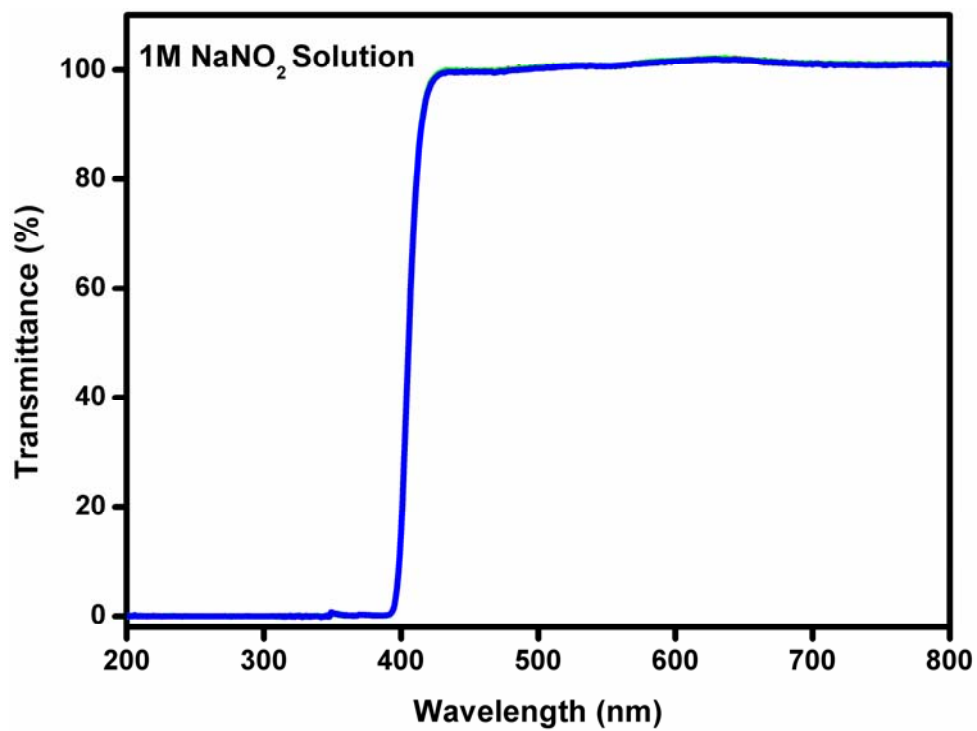

**Fig. S1.** Transmission spectrum of 1M NaNO<sub>2</sub> solution.
